# Supplementary material for: Quercetin Administration Suppresses the Cytokine Storm in Myeloid and Plasmacytoid Dendritic Cells
Source: MDPI journal article supplement (doi:10.3390/ijms22158349), 2021-08-03
Supplement: s1 [file s1]

SUPPLEMENTARY MATERIAL

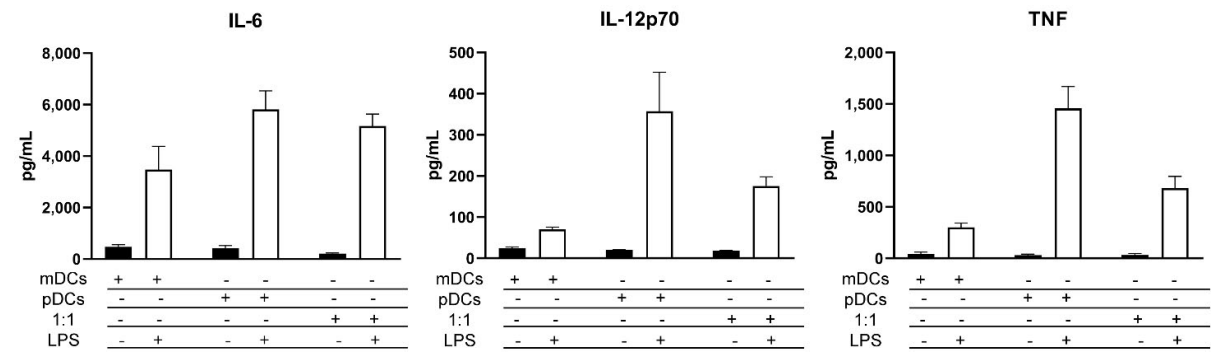

**Figure S1.** Bar plots expressing the mean  $\pm$  SEM (n=3) for secreted cytokines of mDCs, pDCs and 1:1 culture in baseline conditions and after stimulation with LPS.

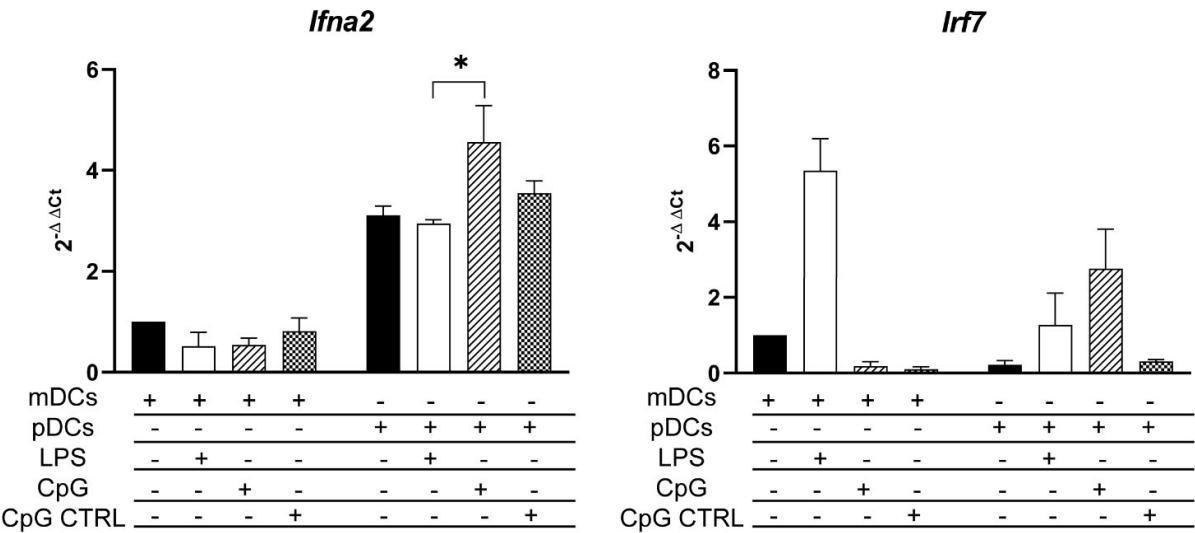

**Figure S2.** Gene expression profiles of mDCs and pDCs 6h after LPS or CpG or CpG control stimulation. Bar plots representing the mean  $\pm$  SEM (n=3) relative to control mDCs. \*p < 0.05.
